# Supplementary material for: First-in-human results of targeted intraoperative molecular imaging for visualization of ground glass opacities during robotic pulmonary resection
Source: PubMed Central journal article supplement — Transl Lung Cancer Res. 2022 Aug;11(8):1567–77. doi: 10.21037/tlcr-21-1004 (PMC9459620; doi:10.21037/tlcr-21-1004), 2022-08
Supplement: tlcr-11-08-1567-dss.pdf [file tlcr-11-08-1567-dss.pdf]

## Data Sharing Statement

|                     |                                                                                                                                                     |                                                                                                                                                                                        |
|---------------------|-----------------------------------------------------------------------------------------------------------------------------------------------------|----------------------------------------------------------------------------------------------------------------------------------------------------------------------------------------|
| <b>Article Info</b> | <a href="https://dx.doi.org/10.21037/tlcr-21-1004">https://dx.doi.org/10.21037/tlcr-21-1004</a>                                                     |                                                                                                                                                                                        |
| <b>Item</b>         | <b>Question</b>                                                                                                                                     | <b>Authors' Response<br/>(place "-" if not applicable)</b>                                                                                                                             |
| 1                   | Would you like to share data collected for your study to others?                                                                                    | Yes, all data underlying the conclusions of this study are either available in the included Figures and Table, or are available from the Corresponding Author upon reasonable request. |
| 2                   | If not, would you like to share the reason for your decision?                                                                                       | -                                                                                                                                                                                      |
| 3                   | What data in particular will be shared?                                                                                                             | Upon publication of the manuscript.                                                                                                                                                    |
| 4                   | Any other documents will be shared? Such as study protocol, statistical analysis plan, informed consent form, clinical study report, analytic code. | -                                                                                                                                                                                      |
| 5                   | When will data availability begin?                                                                                                                  | Upon publication of the manuscript.                                                                                                                                                    |
| 6                   | When will data availability end?                                                                                                                    | -                                                                                                                                                                                      |
| 7                   | To whom will you share the data?                                                                                                                    | All readers or interested parties.                                                                                                                                                     |
| 8                   | For what type of analysis or purpose?                                                                                                               | -                                                                                                                                                                                      |
| 9                   | How or where can the data/documents be obtained?                                                                                                    | All data underlying the conclusions of this study are either available in the included Figures and Table, or are available from the Corresponding Author upon reasonable request.      |
| 10                  | Any other restrictions?                                                                                                                             | -                                                                                                                                                                                      |
