# Supplementary material for: First-in-human results of targeted intraoperative molecular imaging for visualization of ground glass opacities during robotic pulmonary resection
Source: PubMed Central journal article supplement — Transl Lung Cancer Res. 2022 Aug;11(8):1567–77. doi: 10.21037/tlcr-21-1004 (PMC9459620; doi:10.21037/tlcr-21-1004), 2022-08
Supplement: tlcr-11-08-1567-rc.pdf [file tlcr-11-08-1567-rc.pdf]

## TREND Statement Checklist

| Paper Section/<br>Topic   | Item<br>No | Descriptor                                                                                                                                     | Reported on Page<br>Number/Line<br>Number | Reported on<br>Section/Paragraph |
|---------------------------|------------|------------------------------------------------------------------------------------------------------------------------------------------------|-------------------------------------------|----------------------------------|
| <b>Title and Abstract</b> |            |                                                                                                                                                |                                           |                                  |
| Title and Abstract        | 1          | • Information on how unit were allocated to interventions                                                                                      | p 2 lines 46-50                           | Abstract, paragraph 2            |
|                           |            | • Structured abstract recommended                                                                                                              | p 2 lines 41-62                           | Abstract, paragraphs 1-4         |
|                           |            | • Information on target population or study sample                                                                                             | p 2 lines 46-50                           | Abstract, paragraph 2            |
| <b>Introduction</b>       |            |                                                                                                                                                |                                           |                                  |
| Background                | 2          | • Scientific background and explanation of rationale                                                                                           | p3-4 lines 66-102                         | Introduction, paragraphs 1-2     |
|                           |            | • Theories used in designing behavioral interventions                                                                                          | p3-4 lines 66-102                         | Introduction, paragraph 2        |
| <b>Methods</b>            |            |                                                                                                                                                |                                           |                                  |
| Participants              | 3          | • Eligibility criteria for participants, including criteria at different levels in recruitment/sampling plan (e.g., cities, clinics, subjects) | p4-6 lines 106-142                        | Methods, paragraph 1             |
|                           |            | • Method of recruitment (e.g., referral, self-selection), including the sampling method if a systematic sampling plan was implemented          | p4-6 lines 106-142                        | Methods, paragraph 1             |
|                           |            | • Recruitment setting                                                                                                                          | p4-6 lines 106-142                        | Methods, paragraph 1             |
|                           |            | • Settings and locations where the data were collected                                                                                         | p4-6 lines 106-142                        | Methods, paragraph 1             |
| Interventions             | 4          | • Details of the interventions intended for each study condition and how and when they were actually administered, specifically including:     | p6 lines 130-152                          | Methods, paragraph 3             |
|                           |            | o Content: what was given?                                                                                                                     | p6 lines 130-152                          | Methods, paragraph 2-3           |
|                           |            | o Delivery method: how was the content given?                                                                                                  | p6 lines 130-152                          | Methods, paragraph 2-3           |
|                           |            | o Unit of delivery: how were the subjects grouped during delivery?                                                                             | p6 lines 130-152                          | Methods, paragraph 2-3           |
|                           |            | o Deliverer: who delivered the intervention?                                                                                                   | p6 lines 130-152                          | Methods, paragraph 2-3           |
|                           |            | o Setting: where was the intervention delivered?                                                                                               | p6 lines 130-152                          | Methods, paragraph 2-3           |
|                           |            | o Exposure quantity and duration: how many sessions or episodes or events were intended to be delivered? How long were they intended to last?  | p6 lines 130-152                          | Methods, paragraph 2-3           |

|                     |    |                                                                                                                                                                                                                                                                                            |                    |                                   |
|---------------------|----|--------------------------------------------------------------------------------------------------------------------------------------------------------------------------------------------------------------------------------------------------------------------------------------------|--------------------|-----------------------------------|
|                     |    | <ul style="list-style-type: none"> <li>o Time span: how long was it intended to take to deliver the intervention to each unit?</li> </ul>                                                                                                                                                  | p6 lines 130-152   | Methods, paragraph 2-3            |
|                     |    | <ul style="list-style-type: none"> <li>o Activities to increase compliance or adherence (e.g., incentives)</li> </ul>                                                                                                                                                                      | n/a                | n/a                               |
| Objectives          | 5  | <ul style="list-style-type: none"> <li>• Specific objectives and hypotheses</li> </ul>                                                                                                                                                                                                     | p4 lines 106-111   | Introduction, paragraph 4         |
| Outcomes            | 6  | <ul style="list-style-type: none"> <li>• Clearly defined primary and secondary outcome measures</li> </ul>                                                                                                                                                                                 | p4 lines 106-111   | Introduction, paragraph 4         |
|                     |    | <ul style="list-style-type: none"> <li>• Methods used to collect data and any methods used to enhance the quality of measurements</li> </ul>                                                                                                                                               | p6 lines 130-152   | Methods, paragraph 2-3            |
|                     |    | <ul style="list-style-type: none"> <li>• Information on validated instruments such as psychometric and biometric properties</li> </ul>                                                                                                                                                     | n/a                | n/a                               |
| Sample Size         | 7  | <ul style="list-style-type: none"> <li>• How sample size was determined and, when applicable, explanation of any interim analyses and stopping rules</li> </ul>                                                                                                                            | p4 lines 106-108   | Methods, paragraph 1              |
| Assignment Method   | 8  | <ul style="list-style-type: none"> <li>• Unit of assignment (the unit being assigned to study condition, e.g., individual, group, community)</li> </ul>                                                                                                                                    | p4-5 lines 106-116 | Methods, paragraph 1              |
|                     |    | <ul style="list-style-type: none"> <li>• Method used to assign units to study conditions, including details of any restriction (e.g., blocking, stratification, minimization)</li> </ul>                                                                                                   | p4-5 lines 106-116 | Methods, paragraph 1              |
|                     |    | <ul style="list-style-type: none"> <li>• Inclusion of aspects employed to help minimize potential bias induced due to non-randomization (e.g., matching)</li> </ul>                                                                                                                        | n/a                | n/a                               |
| Blinding (masking)  | 9  | <ul style="list-style-type: none"> <li>• Whether or not participants, those administering the interventions, and those assessing the outcomes were blinded to study condition assignment; if so, statement regarding how the blinding was accomplished and how it was assessed.</li> </ul> | n/a                | n/a                               |
| Unit of Analysis    | 10 | <ul style="list-style-type: none"> <li>• Description of the smallest unit that is being analyzed to assess intervention effects (e.g., individual, group, or community)</li> </ul>                                                                                                         | p4-5 lines 106-116 | Methods, paragraph 1              |
|                     |    | <ul style="list-style-type: none"> <li>• If the unit of analysis differs from the unit of assignment, the analytical method used to account for this (e.g., adjusting the standard error estimates by the design effect or using multilevel analysis)</li> </ul>                           | n/a                | n/a                               |
| Statistical Methods | 11 | <ul style="list-style-type: none"> <li>• Statistical methods used to compare study groups for primary methods outcome(s), including complex methods of correlated data</li> </ul>                                                                                                          | p8 lines 192-193   | Methods, paragraph 8-9            |
|                     |    | <ul style="list-style-type: none"> <li>• Statistical methods used for additional analyses, such as a subgroup analyses and adjusted analysis</li> </ul>                                                                                                                                    | n/a                | n/a                               |
|                     |    | <ul style="list-style-type: none"> <li>• Methods for imputing missing data, if used</li> </ul>                                                                                                                                                                                             | n/a                | n/a                               |
|                     |    | <ul style="list-style-type: none"> <li>• Statistical software or programs used</li> </ul>                                                                                                                                                                                                  | p8 lines 192-193   | Methods, paragraph 9              |
| <b>Results</b>      |    |                                                                                                                                                                                                                                                                                            |                    |                                   |
| Participant flow    | 12 | <ul style="list-style-type: none"> <li>• Flow of participants through each stage of the study: enrollment, assignment, allocation, and intervention exposure, follow-up, analysis (a diagram is strongly recommended)</li> </ul>                                                           | p4-6 lines 106-144 | Methods, paragraph 1 and Figure 1 |
|                     |    | <ul style="list-style-type: none"> <li>o Enrollment: the numbers of participants screened for eligibility, found to be eligible or not eligible, declined to be enrolled, and enrolled in the study</li> </ul>                                                                             | p4-6 lines 106-144 | Methods, paragraph 1-2            |

|                         |    |                                                                                                                                                                                                                                                                           |                      |                                                                                                           |
|-------------------------|----|---------------------------------------------------------------------------------------------------------------------------------------------------------------------------------------------------------------------------------------------------------------------------|----------------------|-----------------------------------------------------------------------------------------------------------|
|                         |    | <ul style="list-style-type: none"> <li>o Assignment: the numbers of participants assigned to a study condition</li> </ul>                                                                                                                                                 | p4-6 lines 106-144   | Methods, paragraph 1-3                                                                                    |
|                         |    | <ul style="list-style-type: none"> <li>o Allocation and intervention exposure: the number of participants assigned to each study condition and the number of participants who received each intervention</li> </ul>                                                       | p4-6 lines 106-144   | Methods, paragraph 1-3                                                                                    |
|                         |    | <ul style="list-style-type: none"> <li>o Follow-up: the number of participants who completed the follow-up or did not complete the follow-up (i.e., lost to follow-up), by study condition</li> </ul>                                                                     | p4-6 lines 106-144   | Methods, paragraph 1-3                                                                                    |
|                         |    | <ul style="list-style-type: none"> <li>o Analysis: the number of participants included in or excluded from the main analysis, by study condition</li> </ul>                                                                                                               | p4-6 lines 106-144   | Methods, paragraph 1-3                                                                                    |
|                         |    | <ul style="list-style-type: none"> <li>• Description of protocol deviations from study as planned, along with reasons</li> </ul>                                                                                                                                          | n/a                  | n/a                                                                                                       |
| Recruitment             | 13 | <ul style="list-style-type: none"> <li>• Dates defining the periods of recruitment and follow-up</li> </ul>                                                                                                                                                               | p4-5 lines 106-116   | Methods, paragraph 1-3                                                                                    |
| Baseline Data           | 14 | <ul style="list-style-type: none"> <li>• Baseline demographic and clinical characteristics of participants in each study condition</li> </ul>                                                                                                                             | p8-9 lines 195-205   | Results, paragraph 1,  |
|                         |    | <ul style="list-style-type: none"> <li>• Baseline characteristics for each study condition relevant to specific disease prevention research</li> </ul>                                                                                                                    | p8-9 lines 195-205   | Results, paragraph 1,  |
|                         |    | <ul style="list-style-type: none"> <li>• Baseline comparisons of those lost to follow-up and those retained, overall and by study condition</li> </ul>                                                                                                                    | p8-9 lines 195-205   | Results, paragraph 1,  |
|                         |    | <ul style="list-style-type: none"> <li>• Comparison between study population at baseline and target population of interest</li> </ul>                                                                                                                                     | n/a                  | n/a                                                                                                       |
| Baseline equivalence    | 15 | <ul style="list-style-type: none"> <li>• Data on study group equivalence at baseline and statistical methods used to control for baseline differences</li> </ul>                                                                                                          | n/a                  | n/a                                                                                                       |
| Numbers analyzed        | 16 | <ul style="list-style-type: none"> <li>• Number of participants (denominator) included in each analysis for each study condition, particularly when the denominators change for different outcomes; statement of the results in absolute numbers when feasible</li> </ul> | p8-9 lines 195-205   | Results, paragraph 1, Table 1                                                                             |
|                         |    | <ul style="list-style-type: none"> <li>• Indication of whether the analysis strategy was “intention to treat” or, if not, description of how non-compliers were treated in the analyses</li> </ul>                                                                        | n/a                  | n/a                                                                                                       |
| Outcomes and estimation | 17 | <ul style="list-style-type: none"> <li>• For each primary and secondary outcome, a summary of results for each estimation study condition, and the estimated effect size and a confidence interval to indicate the precision</li> </ul>                                   | p9-13, lines 214-287 | Results, paragraph 2-6                                                                                    |
|                         |    | <ul style="list-style-type: none"> <li>• Inclusion of null and negative findings</li> </ul>                                                                                                                                                                               | p9-13, lines 214-287 | Results, paragraph 2-6                                                                                    |
|                         |    | <ul style="list-style-type: none"> <li>• Inclusion of results from testing pre-specified causal pathways through which the intervention was intended to operate, if any</li> </ul>                                                                                        | n/a                  | n/a                                                                                                       |
| Ancillary analyses      | 18 | <ul style="list-style-type: none"> <li>• Summary of other analyses performed, including subgroup or restricted analyses, indicating which are pre-specified or exploratory</li> </ul>                                                                                     | n/a                  | n/a                                                                                                       |
| Adverse events          | 19 | <ul style="list-style-type: none"> <li>• Summary of all important adverse events or unintended effects in each study condition (including summary measures, effect size estimates, and confidence intervals)</li> </ul>                                                   | p8-9, lines 196-206  | Results, paragraph 1                                                                                      |

| DISCUSSION       |    |                                                                                                                                                                                                                                                                                                                                  |                       |                           |
|------------------|----|----------------------------------------------------------------------------------------------------------------------------------------------------------------------------------------------------------------------------------------------------------------------------------------------------------------------------------|-----------------------|---------------------------|
| Interpretation   | 20 | <ul style="list-style-type: none"> <li>• Interpretation of the results, taking into account study hypotheses, sources of potential bias, imprecision of measures, multiplicative analyses, and other limitations or weaknesses of the study</li> </ul>                                                                           | p13-16, lines 291-358 | Discussion, paragraph 1   |
|                  |    | <ul style="list-style-type: none"> <li>• Discussion of results taking into account the mechanism by which the intervention was intended to work (causal pathways) or alternative mechanisms or explanations</li> </ul>                                                                                                           | p13-16, lines 291-358 | Discussion, paragraph 1   |
|                  |    | <ul style="list-style-type: none"> <li>• Discussion of the success of and barriers to implementing the intervention, fidelity of implementation</li> </ul>                                                                                                                                                                       | p13-16, lines 291-358 | Discussion, paragraph 6   |
|                  |    | <ul style="list-style-type: none"> <li>• Discussion of research, programmatic, or policy implications</li> </ul>                                                                                                                                                                                                                 | p13-16, lines 291-358 | Discussion, paragraph 7   |
| Generalizability | 21 | <ul style="list-style-type: none"> <li>• Generalizability (external validity) of the trial findings, taking into account the study population, the characteristics of the intervention, length of follow-up, incentives, compliance rates, specific sites/settings involved in the study, and other contextual issues</li> </ul> | p13-16, lines 291-358 | Discussion, paragraph 6   |
| Overall Evidence | 22 | <ul style="list-style-type: none"> <li>• General interpretation of the results in the context of current evidence and current theory</li> </ul>                                                                                                                                                                                  | p13-16, lines 291-358 | Discussion, paragraph 6-7 |

**From:** Des Jarlais, D. C., Lyles, C., Crepaz, N., & the Trend Group (2004). Improving the reporting quality of nonrandomized evaluations of behavioral and public health interventions: The TREND statement. *American Journal of Public Health*, 94, 361-366. For more information, visit: <http://www.cdc.gov/trendstatement/>

Article Information: <https://dx.doi.org/10.21037/tlcr-21-1004>

\*As the checklist was provided upon initial submission, the page number/line number reported may be changed due to copyediting and may not be referable in the published version. In this case, the section/paragraph may be used as an alternative reference.
